# Supplementary material for: Peculiar surface–interface properties of nanocrystalline ceria–cobalt oxides with enhanced oxygen storage capacity
Source: Royal Society of Chemistry journal article supplement (doi:10.1039/c4cp03390f), 2014-09-04
Supplement: c4cp03390f1.pdf [file c4cp03390f1.pdf]

Electronic Supplementary Information

## **Peculiar surface-interface properties of nanocrystalline ceria-cobalt oxides with enhanced oxygen storage capacity**

Nan Qiu,<sup>a</sup> Jing Zhang<sup>a,\*</sup> and Ziyu Wu<sup>a,b,\*</sup>

<sup>a</sup> Beijing Synchrotron Radiation Laboratory, Institute of High Energy Physics, Chinese Academy of Sciences, Beijing, 100049, P. R. China. Email: [jzhang@ihep.ac.cn](mailto:jzhang@ihep.ac.cn)

<sup>b</sup> National Synchrotron Radiation Laboratory, University of Science and Technology of China, Hefei 230026, P.R. China. Email: [wuzy@ustc.edu.cn](mailto:wuzy@ustc.edu.cn)

**Table S1. Co structural parameters for the calcined samples**

|                                               | shells | CN <sup>a</sup> | R (Å) <sup>b</sup> | $\sigma^2$ ( $10^{-3}$ Å <sup>2</sup> ) |
|-----------------------------------------------|--------|-----------------|--------------------|-----------------------------------------|
| Co <sub>3</sub> O <sub>4</sub> <sup>[1]</sup> | Co-O   | 6               | 1.89               | -                                       |
|                                               | Co-Co1 | 6               | 2.86               | -                                       |
|                                               | Co-Co2 | 6               | 3.35               | -                                       |
| CeCo6                                         | Co-O   | 3.8             | 1.91               | 6.9                                     |
|                                               | Co-Co  | 0.4             | 2.82               | 2.0                                     |
|                                               | Co-Ce  | 1.1             | 3.75               | 6.8                                     |
| CeCo14                                        | Co-O   | 4.2             | 1.92               | 5.1                                     |
|                                               | Co-Co1 | 2.1             | 2.86               | 4.1                                     |
|                                               | Co-Co2 | 2.7             | 3.38               | 6.3                                     |

<sup>a</sup> and <sup>b</sup> :Errors were estimated to be 20% for the coordination numbers (CN) and 0.02 Å for the bond distances (R).

**Table S2. Ce structural parameters for the calcined samples**

|                  | shells | CN <sup>a</sup> | R (Å) <sup>b</sup> | $\sigma^2$ ( $10^{-3}$ Å <sup>2</sup> ) |
|------------------|--------|-----------------|--------------------|-----------------------------------------|
| CeO <sub>2</sub> | Ce-O   | 8*              | 2.34               | 1.9                                     |
| CeCo0            | Ce-O   | 7.1             | 2.34               | 3.7                                     |
| CeCo6            | Ce-O   | 5.2             | 2.33               | 2.9                                     |
| CeCo14           | Ce-O   | 4.9             | 2.33               | 2.9                                     |

<sup>a</sup> and <sup>b</sup> : Errors were estimated to be 20% for the coordination numbers (CN) and 0.02 Å for the bond distances (R). <sup>c</sup>: The content of Ce or Co in components in sample CeCo6 and CeCo14. \* : fixed parameter.

[1] Liu, T.; Xu, H.; Chin, W. S.; Yang, P.; Yong, Z.; Wee, A. T. S. *J. Phys. Chem. C* **2008**, *112*, 13410.
